# Supplementary material for: Screening for Glucose Metabolism Disorders, Assessment the Disse Insulin Resistance Index and Hospital Prognosis of Coronary Artery Bypass Surgery
Source: MDPI journal article supplement (doi:10.3390/jpm11080802), 2021-08-17
Supplement: s1 [file s1]

Supplementary Table S1. Multiple linear regression (Forward) in assessing the FFA relationship with other Indicators (Model Summary).

| Model | R                  | R <sup>2</sup> | Adjusted R Square | Std. Error of the Estimate |
|-------|--------------------|----------------|-------------------|----------------------------|
| 1     | 0.374 <sup>a</sup> | 0.140          | 0.135             | 0.27717                    |
| 2     | 0.427 <sup>b</sup> | 0.182          | 0.173             | 0.27101                    |
| 3     | 0.463 <sup>c</sup> | 0.215          | 0.202             | 0.26622                    |
| 4     | 0.494 <sup>d</sup> | 0.244          | 0.228             | 0.26191                    |
| 5     | 0.515 <sup>e</sup> | 0.265          | 0.245             | 0.25899                    |

a. Predictors: (Constant). TG

b. Predictors: (Constant). TG, HeartRate/

c. Predictors: (Constant). TG, HeartRate. APTT/

d. Predictors: (Constant). TG, HeartRate. APTT, BMI

e. Predictors: (Constant). TG, HeartRate. APTT, BMI, Glucose.

*FFA – free fatty acids, TG – triglycerides, APTT – complex activated partial thromboplastin time, BMI – body mass index.*

Supplementary Table S2. Multiple linear regression (Forward) in assessing the Disse index relationship with other indicators (Model Summary).

| Model | R                  | R <sup>2</sup> | Adjusted R Square | Std. Error of the Estimate |
|-------|--------------------|----------------|-------------------|----------------------------|
| 1     | 0.311 <sup>a</sup> | 0.096          | 0.078             | 9.63171                    |
| 2     | 0.423 <sup>b</sup> | 0.179          | 0.144             | 9.27802                    |

a. Predictors: (Constant). IVS

b. Predictors: (Constant). IVS. LVEF

*IVS – interventricular septum. LV – left ventricular ejection fraction.*

Supplementary Table S3. Predictors of the combined endpoint (postoperative complications or length of stay > 10 days) in binary logistic regression (Forward LR analysis, Model Summary).

| Step | -2 Log likelihood   | Cox & Snell R Square | Nagelkerke R Square |
|------|---------------------|----------------------|---------------------|
| 1    | 40.943 <sup>a</sup> | 0.340                | 0.463               |
| 2    | 35.474 <sup>a</sup> | 0.416                | 0.566               |
| 3    | 30.357 <sup>b</sup> | 0.479                | 0.652               |
| 4    | 24.174 <sup>b</sup> | 0.546                | 0.743               |

a. Estimation terminated at iteration number 6 because parameter estimates changed by less than .001.

b. Estimation terminated at iteration number 7 because parameter estimates changed by less than .001.

Supplementary Table S4. Metabolic predictors of the combined endpoint (poor outcome or length of stay > 10 days) in binary logistic regression (Forward LR analysis, Model Summary).

| Step | -2 Log likelihood    | Cox & Snell R Square | Nagelkerke R Square |
|------|----------------------|----------------------|---------------------|
| 1    | 166.022 <sup>a</sup> | 0.076                | 0.114               |
| 2    | 155.298 <sup>a</sup> | 0.135                | 0.202               |
| 3    | 148.160 <sup>a</sup> | 0.172                | 0.258               |

a. Estimation terminated at iteration number 5 because parameter estimates changed by less than .001.
